# Supplementary material for: Regional Differences in the Prescription of Biologics for Psoriasis in Sweden: A Register-Based Study of 4168 Patients
Source: PubMed Central journal article supplement — BioDrugs. 2017 Jan 17;31(1):75–82. doi: 10.1007/s40259-016-0209-y (PMC5258782; doi:10.1007/s40259-016-0209-y), 2017-01-17
Supplement: 40259_2016_209_MOESM1_ESM.pdf [file 40259_2016_209_MOESM1_ESM.pdf]

# **Regional differences in the prescription of biologics for psoriasis in Sweden: a register-based study of 4,168 patients**

**P.S. Calara <sup>1</sup>, R. Althin <sup>1</sup>, K. Steen Carlsson <sup>1,3</sup>, M. Schmitt-Egenolf <sup>2</sup>**

<sup>1</sup>The Swedish Institute for Health Economics (IHE), Lund, Sweden

<sup>2</sup>Department of Public Health and Clinical Medicine, Dermatology, Umeå University, Umeå, Sweden

<sup>3</sup>Department of Clinical Sciences, Malmö, Lund University, Lund, Sweden

**ELECTRONIC SUPPLEMENTARY MATERIAL**

**MAP OF SWEDEN FEATURING HEALTHCARE REGIONS**

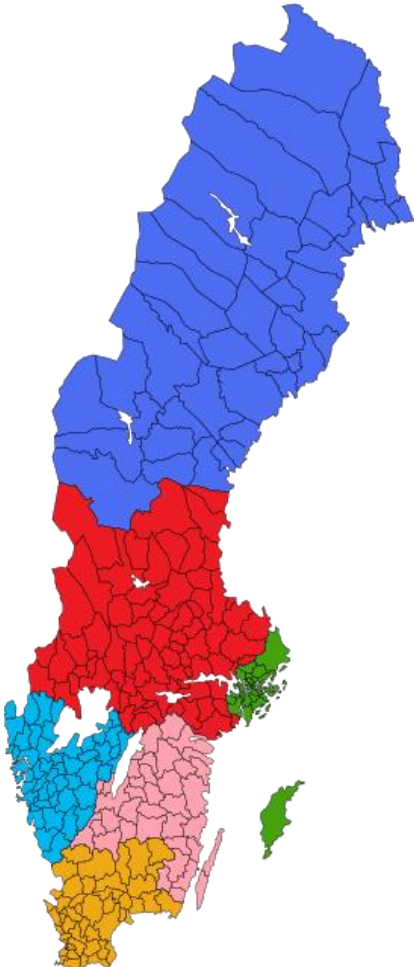

**Figure 4:** Healthcare regions of Sweden: North – Blue, Uppsala-Örebro – Red, Stockholm-Gotland – Green, West – Light Blue, South-East – Pink, South – Yellow [Source: Wikicommons under CC BY-SA 2.5].

## DEMOGRAPHIC CHARACTERISTICS OF HEALTHCARE REGIONS IN SWEDEN

**Table 3:** Descriptive statistics of healthcare regions in 2013–14: population size, education, annual household disposable income, and proportion of persons in two categories of low annual earnings

| Healthcare region* | Population<br>N (%) | Education (%)       |            | Annual household<br>disposable income (EUR) |           | Proportion of persons with low<br>annual earnings (%) |                    |
|--------------------|---------------------|---------------------|------------|---------------------------------------------|-----------|-------------------------------------------------------|--------------------|
|                    |                     | Compulsory<br>only† | University | 18+ years                                   | 65+ years | EUR 1 – 9,250                                         | EUR 9,251 – 18,500 |
| North              | 879,165 (9.1)       | 17.0                | 31.5       | 35,400                                      | 24,800    | 4.6                                                   | 18.1               |
| South-East         | 1,012,957 (10.5)    | 20.8                | 30.6       | 36,200                                      | 25,400    | 5.4                                                   | 18.8               |
| South              | 1,741,584 (18.1)    | 19.3                | 34.9       | 36,000                                      | 25,700    | 6.3                                                   | 18.5               |
| West               | 1,794,322 (18.6)    | 19.3                | 34.7       | 38,100                                      | 26,100    | 5.4                                                   | 17.7               |
| Uppsala-Örebro     | 1,996,633 (20.7)    | 20.1                | 30.4       | 35,500                                      | 25,500    | 5.4                                                   | 18.3               |
| Stockholm-Gotland  | 2,220,203 (23.0)    | 16.1                | 43.1       | 43,200                                      | 29,600    | 6.0                                                   | 14.7               |
| Sweden             | 9,644,864 (100.0)   | 18.7                | 35.1       | 37,700                                      | 26,200    | 5.6                                                   | 17.4               |

**Notes:**

Annual household disposable income includes taxable and non-taxable earnings, social allowances, and other transfers. Annual earnings include total earnings from employment and from business assessed at the individual level.

Source: Statistics Sweden, Statistical database; 2015. <http://scb.se>. Cited Nov 2015.

\* Regions ordered by population size; † Maximum of nine years of schooling

EUR, euros

## IMPUTATION OF MISSING SCORES ON THE DERMATOLOGY LIFE QUALITY INDEX (DLQI)

**Table 4:** Multiple linear regression models used to impute missing scores on the Dermatology Life Quality index (DLQI)

| Variable                          | 2008–09   | 2010–11   | 2012–13   | 2014–15    | 2008–15    |
|-----------------------------------|-----------|-----------|-----------|------------|------------|
| Constant                          | 7.103***  | 6.326***  | 7.183***  | 7.694***   | 7.707***   |
| PASI                              | 0.388***  | 0.446***  | 0.480***  | 0.554***   | 0.484***   |
| Age                               | -0.055*** | -0.056*** | -0.072*** | -0.074***  | -0.071***  |
| Male                              | -2.198*** | -1.681*** | -1.475*** | -2.025***  | -1.990***  |
| Sample Size                       | 1,573     | 1,935     | 1,950     | 1,417      | 4,018      |
| Adjusted R <sup>2</sup>           | 0.153     | 0.206     | 0.224     | 0.266      | 0.226      |
| Missing DLQI scores, <i>n</i> (%) | 1 (<0.01) | 1 (<0.01) | 9 (<0.01) | 117 (7.63) | 150 (3.60) |

**Notes:**  
 \* 10% \*\* 5% \*\*\* 1% significance level  
 DLQI, Dermatology Life Quality Index; PASI, Psoriasis Area and Severity Index

## RESULTS OF SWITCH TO A BIOLOGIC LOGISTIC REGRESSION IN TWO YEAR PERIODS

**Table 5:** Adjusted odds ratios (ORs) with 95% confidence intervals (CI) from the logistic regression of switch to a biologic against healthcare regions whilst adjusting for disease severity, patient and clinical characteristics, and clinical types or symptoms of psoriasis for 2008–09, 2010–11, 2012–13, and 2014–15 periods

| Variable                                       | 2008–09 (n = 1,574) |              | 2010–11 (n = 1,936) |              | 2012–13 (n = 1,959) |              | 2014–15 (n = 1,525) |              |
|------------------------------------------------|---------------------|--------------|---------------------|--------------|---------------------|--------------|---------------------|--------------|
|                                                | OR                  | 95% CI       |
| <b>Healthcare region</b>                       |                     |              |                     |              |                     |              |                     |              |
| Stockholm-Gotland (reference)                  | 1.00                |              | 1.00                |              | 1.00                |              | 1.00                |              |
| West                                           | 0.23                | (0.12–0.41)  | 0.34                | (0.20–0.60)  | 0.47                | (0.30–0.75)  | 0.59                | (0.35–0.99)  |
| North                                          | 0.49                | (0.29–0.84)  | 0.87                | (0.55–1.38)  | 0.54                | (0.30–0.98)  | 0.55                | (0.21–1.45)  |
| South                                          | 0.41                | (0.22–0.77)  | 0.88                | (0.56–1.39)  | 0.34                | (0.19–0.60)  | 1.89                | (1.20–2.97)  |
| South-East                                     | 0.59                | (0.25–1.38)  | 1.53                | (0.89–2.64)  | 2.23                | (1.37–3.62)  | 1.42                | (0.84–2.38)  |
| Uppsala-Örebro                                 | 0.75                | (0.35–1.58)  | 1.01                | (0.52–1.97)  | 2.02                | (1.18–3.47)  | 1.94                | (1.01–3.72)  |
| <b>Disease severity</b>                        |                     |              |                     |              |                     |              |                     |              |
| PASI                                           | 1.03                | (1.00–1.07)  | 1.03                | (1.00–1.06)  | 1.08                | (1.05–1.11)  | 1.05                | (1.02–1.09)  |
| DLQI                                           | 0.99                | (0.96–1.02)  | 1.01                | (0.98–1.04)  | 1.01                | (0.98–1.04)  | 1.01                | (0.98–1.04)  |
| <b>Patient and clinical characteristics</b>    |                     |              |                     |              |                     |              |                     |              |
| Age                                            | 0.97                | (0.96–0.98)  | 0.97                | (0.96–0.98)  | 0.97                | (0.96–0.98)  | 0.97                | (0.96–0.98)  |
| Male                                           | 1.26                | (0.86–1.84)  | 0.69                | (0.50–0.95)  | 1.11                | (0.79–1.56)  | 1.28                | (0.88–1.85)  |
| Obese <sup>a</sup>                             | 1.15                | (0.79–1.69)  | 1.24                | (0.89–1.73)  | 1.32                | (0.96–1.83)  | 1.09                | (0.76–1.56)  |
| Psoriasis arthritis                            | 2.08                | (1.45–2.99)  | 1.83                | (1.31–2.55)  | 1.15                | (0.80–1.67)  | 1.32                | (0.88–1.97)  |
| <b>Clinical types or symptoms of psoriasis</b> |                     |              |                     |              |                     |              |                     |              |
| Erythroderma                                   | 2.15                | (0.71–6.52)  | 1.66                | (0.56–4.95)  | 0.81                | (0.14–4.85)  | NA <sup>b</sup>     |              |
| Acrodermatitis                                 | 1.04                | (0.13–8.66)  | 13.48               | (2.37–76.76) | 2.51                | (0.26–23.86) | 18.2                | (0.96–343.7) |
| Palm pustular                                  | 0.90                | (0.31–2.62)  | 0.37                | (0.08–1.63)  | 1.26                | (0.41–3.83)  | 1.38                | (0.31–6.19)  |
| Non-palm pustular                              | 1.15                | (0.56–2.34)  | 0.37                | (0.11–1.20)  | 0.76                | (0.30–1.96)  | 0.48                | (0.14–1.62)  |
| General pustular                               | 3.60                | (0.63–20.50) | 3.94                | (1.24–12.52) | 3.65                | (0.78–16.99) | NA <sup>b</sup>     |              |
| Nail psoriasis                                 | 1.53                | (1.45–2.99)  | 0.87                | (0.59–1.27)  | 0.80                | (0.71–1.17)  | 1.59                | (1.05–2.41)  |

**Notes:**

<sup>a</sup> defined as BMI  $\geq$  30, <sup>b</sup> variable was dropped since it predicts switch to a biologic perfectly (*i.e.*, all patients that switched to biologics had the characteristic)

BMI, body mass index; CI, confidence interval; DLQI, Dermatology Life Quality Index; OR, odds ratio; PASI, Psoriasis Area and Severity Index

## RESULTS OF SWITCH TO A BIOLOGIC LOGISTIC REGRESSION FOR THE ENTIRE REGISTRATION PERIOD

**Table 6:** Adjusted odds ratios (ORs) with 95% confidence intervals (CI) from the logistic regression of switch to a biologic against healthcare regions whilst adjusting for disease severity, patient and clinical characteristics, and clinical types or symptoms of psoriasis for the entire registration period (2008–15)

| Variable                                       | 2008–15 ( <i>n</i> = 4,168) |             |
|------------------------------------------------|-----------------------------|-------------|
|                                                | OR                          | 95% CI      |
| <b>Healthcare region</b>                       |                             |             |
| Stockholm-Gotland (reference)                  | 1.00                        |             |
| West                                           | 0.41                        | (0.32–0.53) |
| Uppsala-Örebro                                 | 1.27                        | (0.91–1.75) |
| South                                          | 0.70                        | (0.54–0.89) |
| South-East                                     | 1.18                        | (0.89–1.56) |
| North                                          | 0.55                        | (0.41–0.74) |
| <b>Disease severity</b>                        |                             |             |
| PASI                                           | 1.02                        | (1.00–1.04) |
| DLQI                                           | 0.98                        | (0.97–1.00) |
| <b>Patient and clinical characteristics</b>    |                             |             |
| Age                                            | 0.97                        | (0.97–0.98) |
| Male                                           | 1.15                        | (0.96–1.38) |
| Obese <sup>a</sup>                             | 1.32                        | (1.11–1.57) |
| Psoriasis arthritis                            | 1.61                        | (1.34–1.94) |
| <b>Clinical types or symptoms of psoriasis</b> |                             |             |
| Erythroderma                                   | 1.56                        | (0.72–3.36) |
| Acrodermatitis                                 | 2.20                        | (0.77–6.26) |
| Palm pustular                                  | 0.60                        | (0.32–1.12) |
| Non-palm pustular                              | 0.45                        | (0.27–0.76) |
| General pustular                               | 2.81                        | (1.26–6.24) |
| Nail psoriasis                                 | 1.11                        | (0.91–1.36) |

**Notes:**

<sup>a</sup> defined as BMI  $\geq$  30

BMI, body mass index; CI, confidence interval; DLQI, Dermatology Life Quality Index; OR, odds ratio; PASI, Psoriasis Area and Severity Index

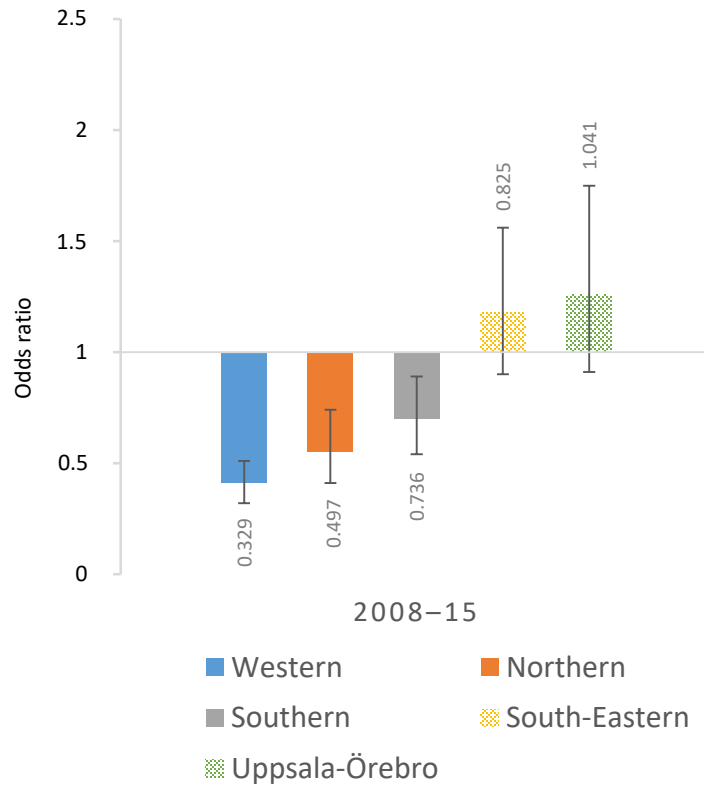

**Figure 5:** Adjusted odds ratios (ORs) with 95% confidence intervals (CI) from the logistic regression of switch to a biologic against healthcare regions whilst adjusting for disease severity, patient and clinical characteristics, and clinical types or symptoms of psoriasis for the entire registration period (2008–15). Hatched bars indicate statistically insignificant differences in ORs to the reference region, Stockholm-Gotland (OR = 1.00)
